# Supplementary material for: Production of antigenically stable enterovirus A71 virus-like particles in Pichia pastoris as a vaccine candidate
Source: PubMed Central journal article supplement (PMC10773253; doi:10.1099/jgv.0.001867), 2023-06-30
Supplement: jgv-104-1867-s001.pdf [file jgv-104-1867-s001.pdf]

Supplementary material:

Figure S1:

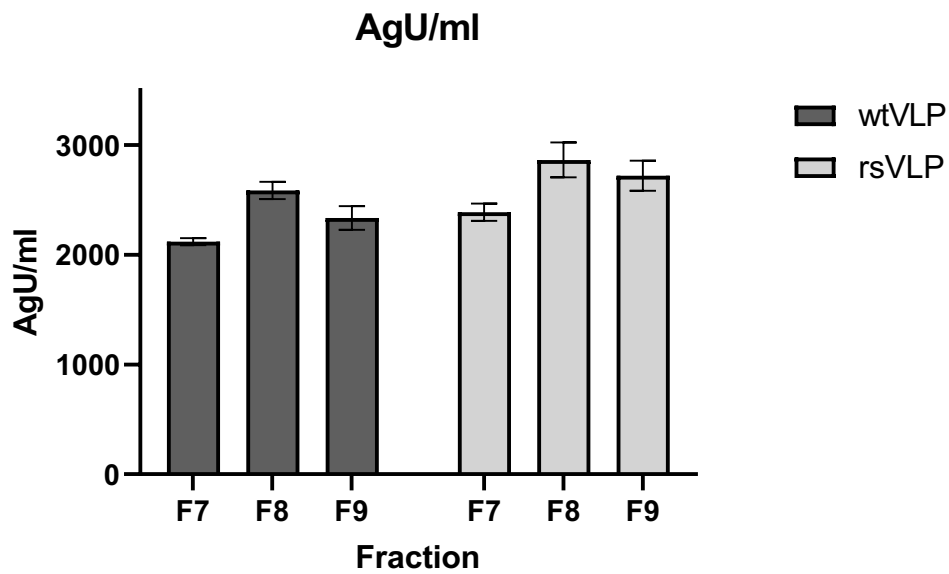

**Figure S1:** Antigen concentration (AgU/ml) of peak VLP fractions determined by the CT11F9 antibody relative to the 18/116 antigen standard.

Figure S2:

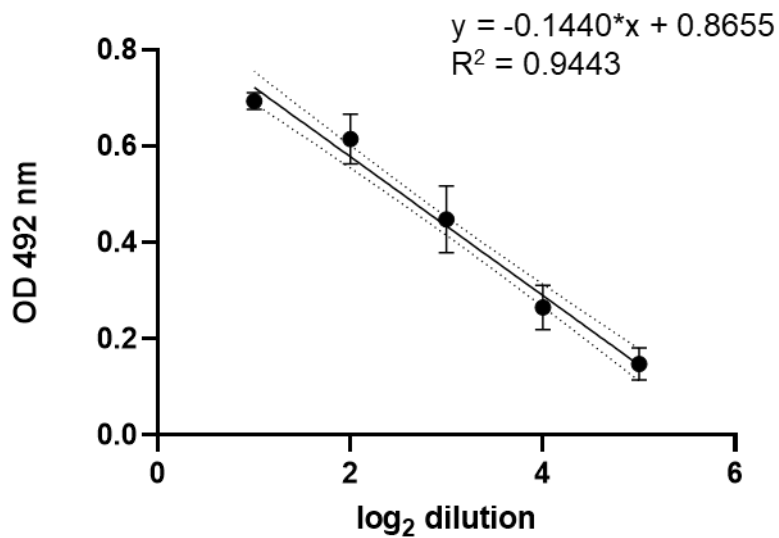

**Figure S2:** Relationship between OD and log<sub>2</sub> dilution of antigen, used to calculate the proportion of HA<sub>g</sub> in samples.

**Figure S3:**

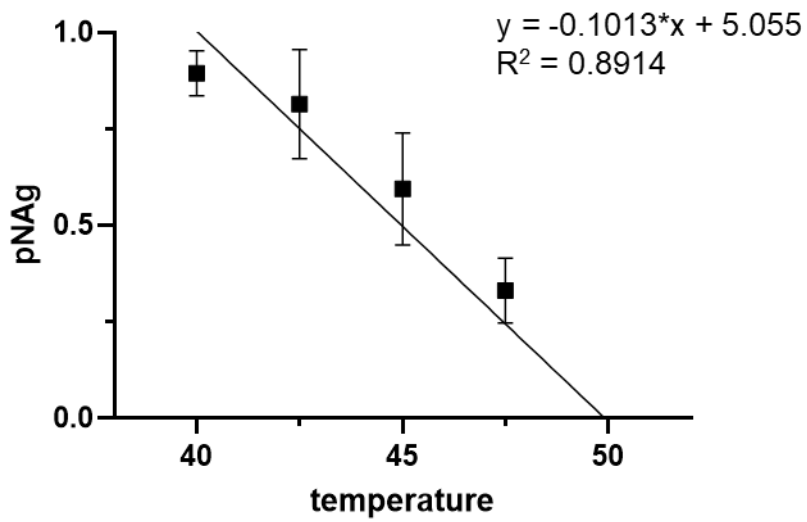

**Figure S3:** Linear regression to estimate antigenic conversion temperature of rsVLPs between 40°C and 50°C.

**Figure S4:**

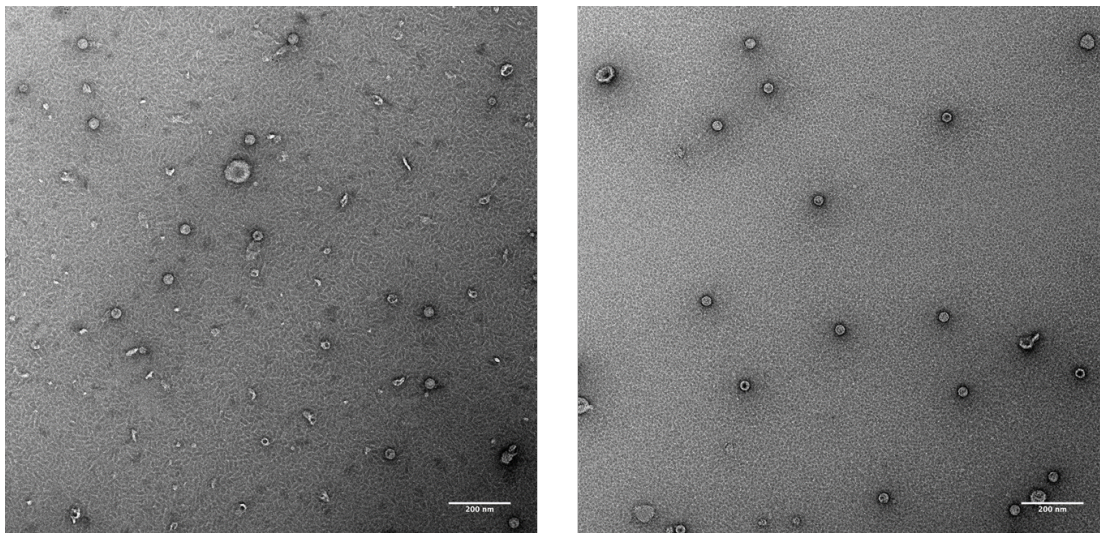

**Figure S4:** Negative stain TEM (using 2% UA) of samples of wtVLPs (left) and rsVLPs (right), scale bar = 200 nm.

**Figure S5:**

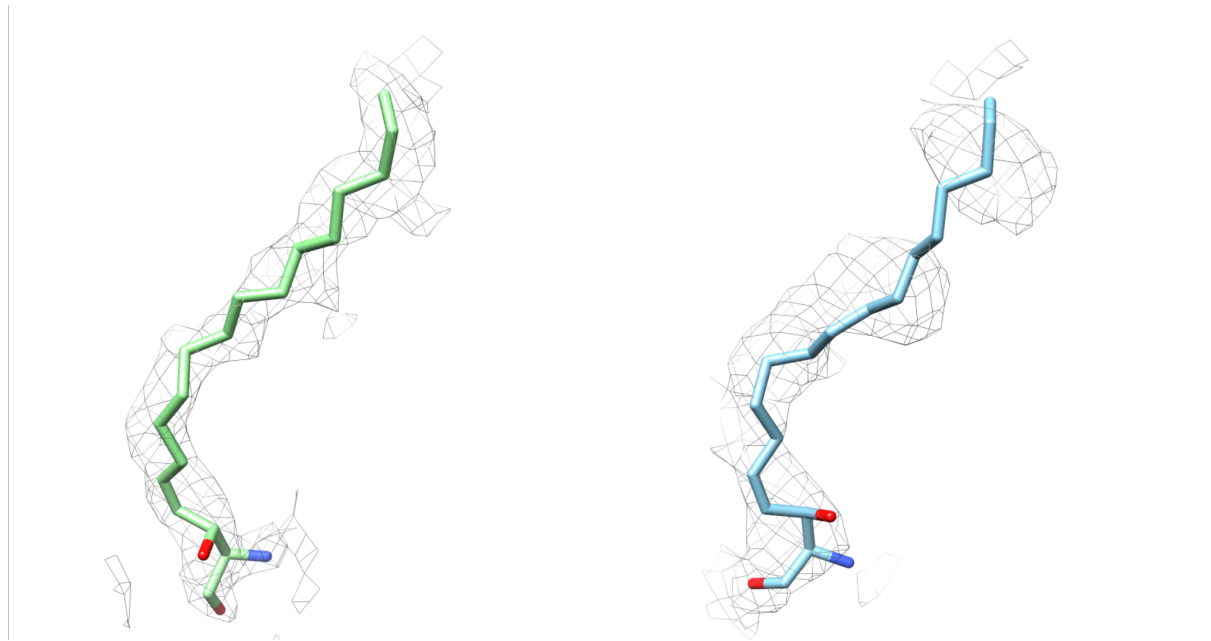

**Figure S5:** Density indicating occupancy of the pocket, present in the major population (left) and the minor population (right) shown at 2.5 rmsd.

**Figure S6:**

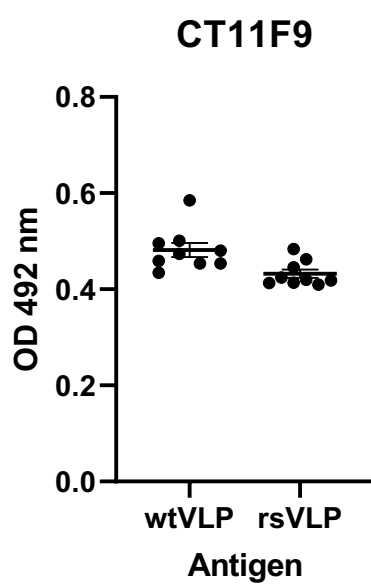

**Figure S6:** Reactivity of VLP (captured on ELISA plates) with CT11F9 antibody.

**Table S1:** specificity of the antibodies used to detect EVA71 antigenic states.

| Antibody     | Source | Specificity | Uses               |
|--------------|--------|-------------|--------------------|
| CT11F9       | mouse  | NAg and HAg | ELISA              |
| mAb 979      | mouse  | HAg         | ELISA/western blot |
| 16-2-2D scFv | human  | NAg         | ELISA              |

**Table S2:** Antigen composition of samples at a range of temperatures

$$\text{proportion HAg} = 2^{(OD_{4^{\circ}C} - OD_{55^{\circ}C})/\text{incline}}$$

| Temperature<br>(°C) | pHAg rsVLP | pNAg rsVLP | pHAg wtVLP | pNAg wtVLP |
|---------------------|------------|------------|------------|------------|
| 4                   | 0.13       | 0.87       | 1.11       | -0.11      |
| 30                  | 0.11       | 0.89       | 0.80       | 0.20       |
| 35                  | 0.10       | 0.90       | 0.69       | 0.31       |
| 37.5                | 0.11       | 0.89       | 0.84       | 0.16       |
| 40                  | 0.14       | 0.86       | 0.97       | 0.03       |
| 42.5                | 0.31       | 0.69       | 1.16       | -0.16      |
| 45                  | 0.46       | 0.54       | 1.18       | -0.18      |
| 47.5                | 0.86       | 0.14       | 1.32       | -0.32      |
| 50                  | 1.10       | -0.10      | 1.54       | -0.54      |
| 52.5                | 1.07       | -0.07      | 1.17       | -0.17      |
| 55                  | 1.00       | 0.00       | 1.00       | 0.00       |
| 60                  | 0.80       | 0.20       | 0.73       | 0.27       |

**Table S3:**

|                                                 | <b>rsVLP</b>          |
|-------------------------------------------------|-----------------------|
| <b>Microscope</b>                               | FEI Titan Krios       |
| <b>Detector mode</b>                            | Counting              |
| <b>Camera</b>                                   | Falcon IV             |
| <b>Voltage (kV)</b>                             | 300                   |
| <b>Pixel size (Å)</b>                           | 0.91                  |
| <b>Nominal magnification</b>                    | 130,000×              |
| <b>Exposure time (s)</b>                        | 5                     |
| <b>Total dose (e<sup>-</sup>/Å<sup>2</sup>)</b> | 31                    |
| <b>Number of fractions</b>                      | 42                    |
| <b>Defocus range (μm)</b>                       | -0.8 to -2.9          |
| <b>Number of micrographs</b>                    | 20,419                |
| <b>Acquisition software</b>                     | Thermo Scientific EPU |

**Table S4:**

| <b>Model</b>                                          | <b><i>rsVLP</i></b> |
|-------------------------------------------------------|---------------------|
| <b>EMDB ID</b>                                        | EMD-16450           |
| <b>PDB ID</b>                                         | PDB-8C6D            |
| <b>CryoEM map processing</b>                          |                     |
| <i>Symmetry imposed</i>                               | 11                  |
| <i>Number of particles contributing to map</i>        | 11,789              |
| <i>Map resolution (FSC = 0.143) (Å)</i>               | 2.4                 |
| <i>Map resolution range at atomic coordinates (Å)</i> | 2.4-2.8             |
| <i>Map sharpening B factor (Å<sup>2</sup>)</i>        | -133.6              |
| <b>Residues modelled</b>                              |                     |
|                                                       | A 58-297            |
|                                                       | B 13-45, 83-323     |
|                                                       | C 1-242             |
| <b>RMSD</b>                                           |                     |
| <i>Bond lengths (Å)</i>                               | 0.0096              |
| <i>Bond angles (°)</i>                                | 1.33                |
| <b>Validation</b>                                     |                     |
| <i>All-atom clashscore</i>                            | 8.17                |
| <i>MolProbity score</i>                               | 2.21                |
| <i>Rotamer outliers (%)</i>                           | 3.89                |
| <b>Ramachandran plot</b>                              |                     |
| <i>Favoured (%)</i>                                   | 95.45               |
| <i>Allowed (%)</i>                                    | 4.55                |
| <i>Outliers (%)</i>                                   | 0.00                |
